# Supplementary material for: In vitro exploration of the Xanthomonas hortorum pv. vitians genome using transposon insertion sequencing and comparative genomics to discriminate between core and contextual essential genes
Source: PubMed Central journal article supplement — Microb Genom. 2021 Mar 24;7(6):000546. doi: 10.1099/mgen.0.000546 (PMC8627662; doi:10.1099/mgen.0.000546), 2021-03-24
Supplement: mgen-7-0546-s001.pdf [file mgen-7-0546-s001.pdf]

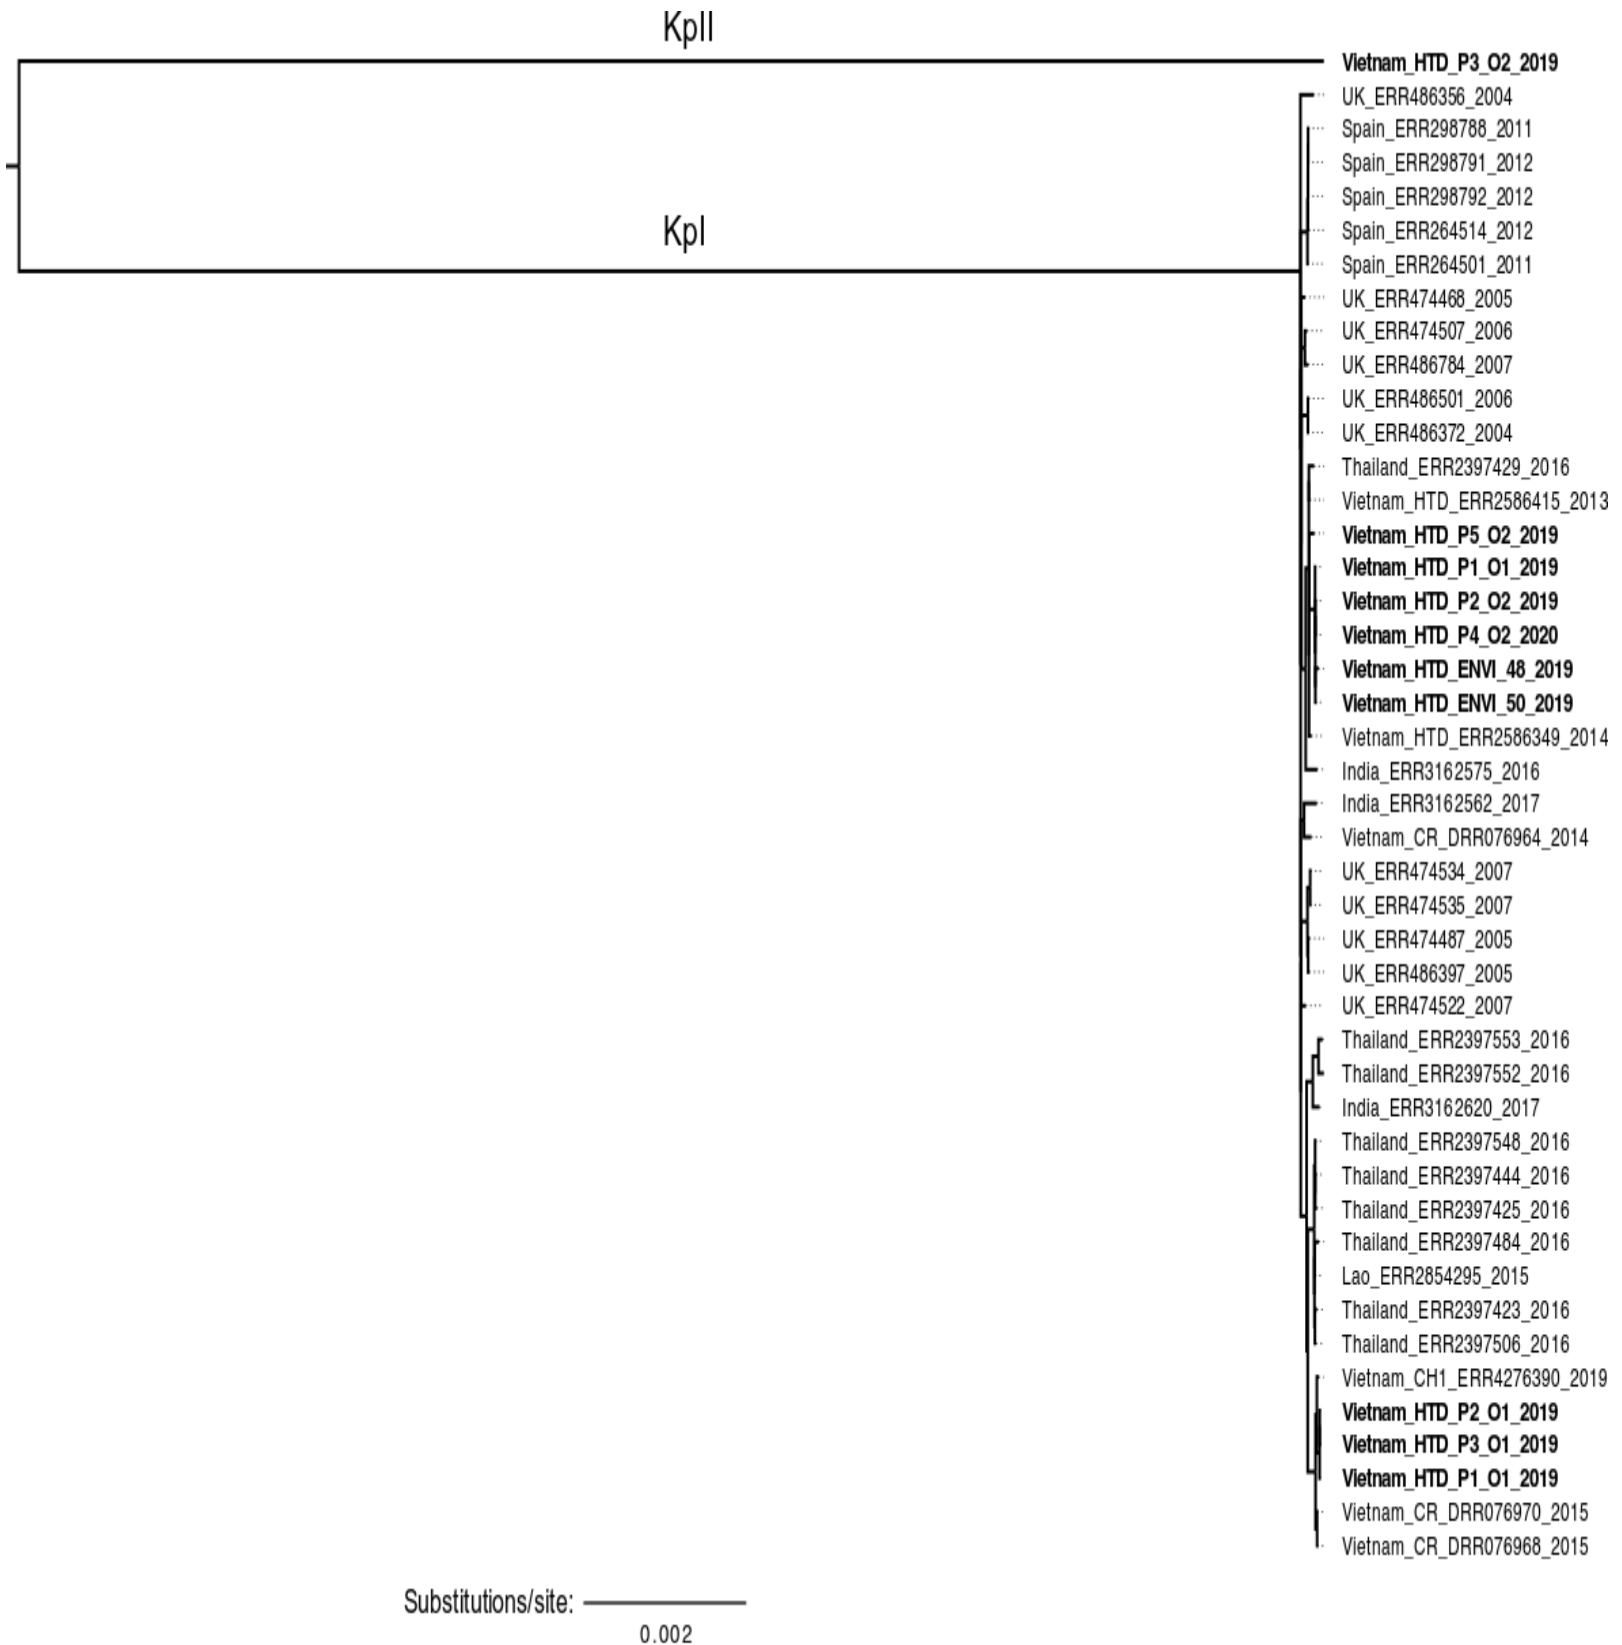

**Figure S1. Phylogenetic relatedness between one ST446 outbreak 2 isolate (KpII) and the remaining ST16 outbreak and environmental isolates (KpI).**

Midpoint rooted phylogeny estimated from the alignment of 12,190 core SNPs identified from or ST446 (*Klebsiella quasipneumoniae*) isolate and nine ST16 isolates (*Klebsiella pneumoniae*) in our study, together with a global collection of 36 ST16 *K. pneumoniae*. The bolded tips highlight the isolates from our study. The scale bar represents nucleotide substitutions per site.
