# Supplementary material for: In vitro exploration of the Xanthomonas hortorum pv. vitians genome using transposon insertion sequencing and comparative genomics to discriminate between core and contextual essential genes
Source: PubMed Central journal article supplement — Microb Genom. 2021 Mar 24;7(6):000546. doi: 10.1099/mgen.0.000546 (PMC8627662; doi:10.1099/mgen.0.000546), 2021-03-24
Supplement: mgen-7-0546-s002.pdf [file mgen-7-0546-s002.pdf]

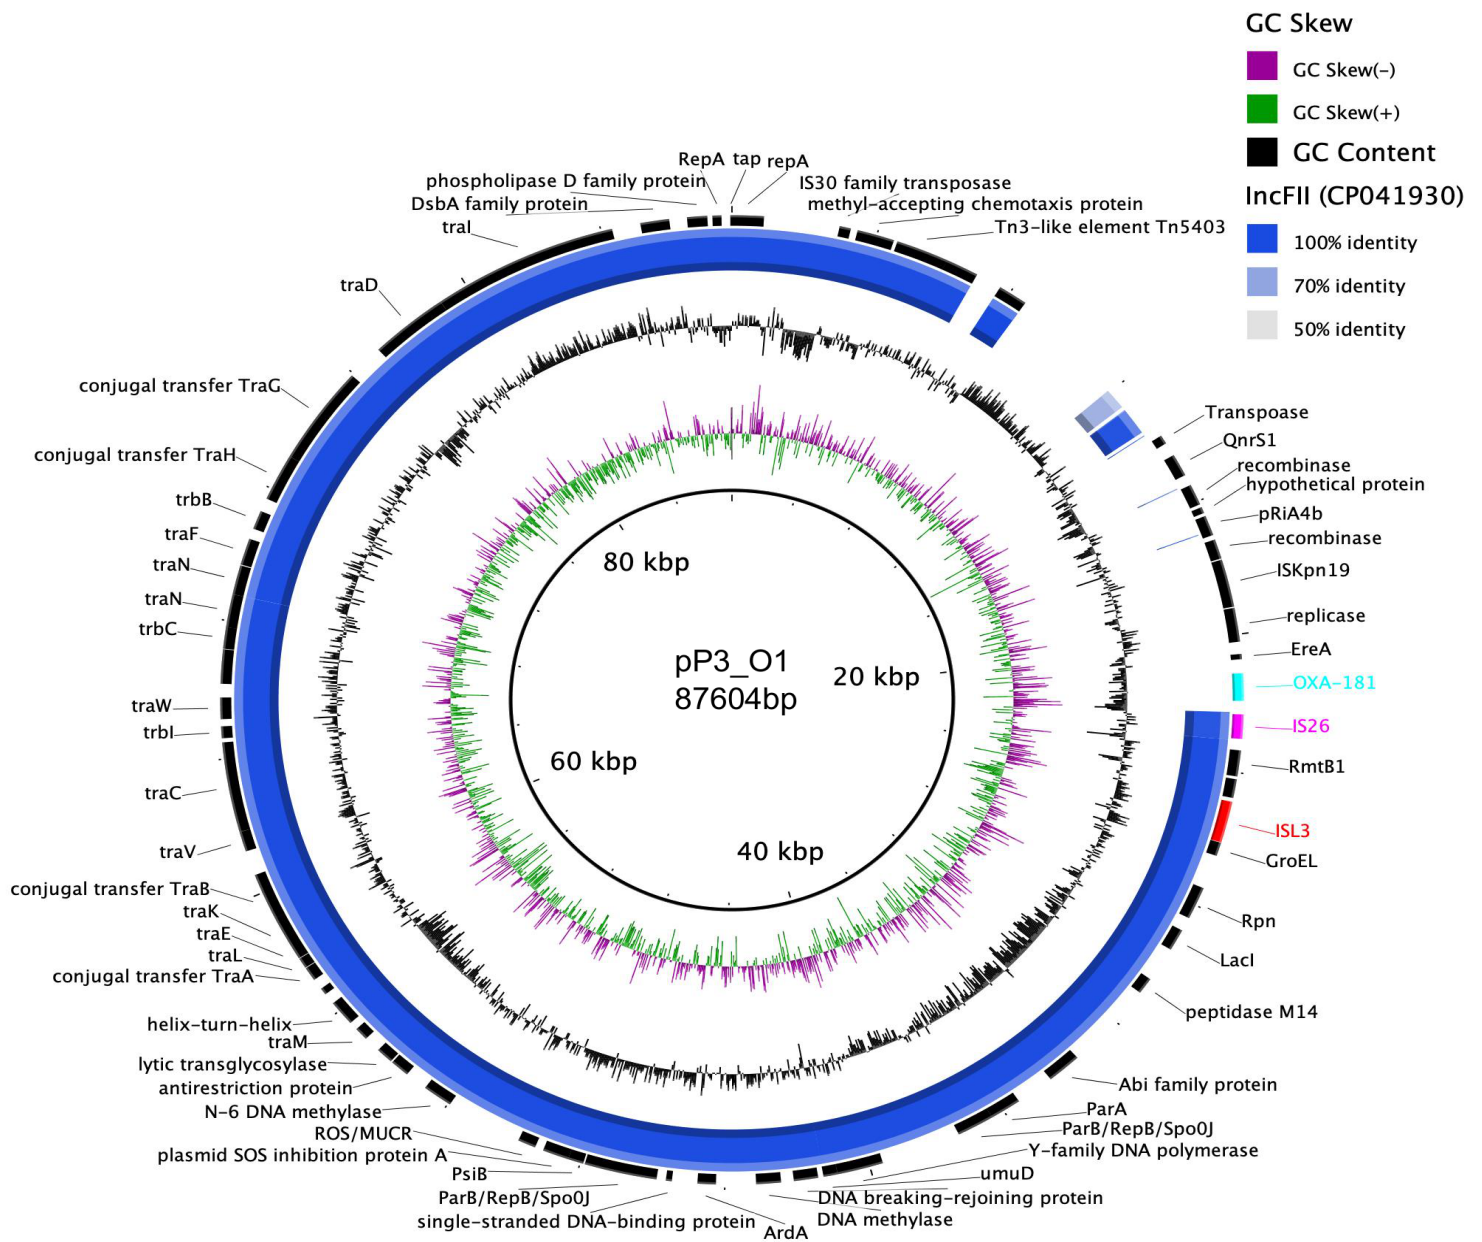

**Figure S2. Genetic structure of *bla*<sub>OXA181</sub>-carrying plasmid pP3\_O1.**

BLASTN comparison between the *bla*<sub>OXA181</sub>-carrying plasmid pP3\_O1 (central ring) identified from a carbapenem resistant ST16 outbreak isolate and a reference plasmid from GenBank (Accession number: CP041930.1). The outermost ring indicates the gene annotations of the pP3\_O1 plasmid. The ISL3-like element is highlighted in red. Cyan and pink colors indicate the *bla*<sub>OXA181</sub> gene and IS26, respectively.
