# Supplementary material for: In vitro exploration of the Xanthomonas hortorum pv. vitians genome using transposon insertion sequencing and comparative genomics to discriminate between core and contextual essential genes
Source: PubMed Central journal article supplement — Microb Genom. 2021 Mar 24;7(6):000546. doi: 10.1099/mgen.0.000546 (PMC8627662; doi:10.1099/mgen.0.000546), 2021-03-24
Supplement: mgen-7-0546-s003.pdf [file mgen-7-0546-s003.pdf]

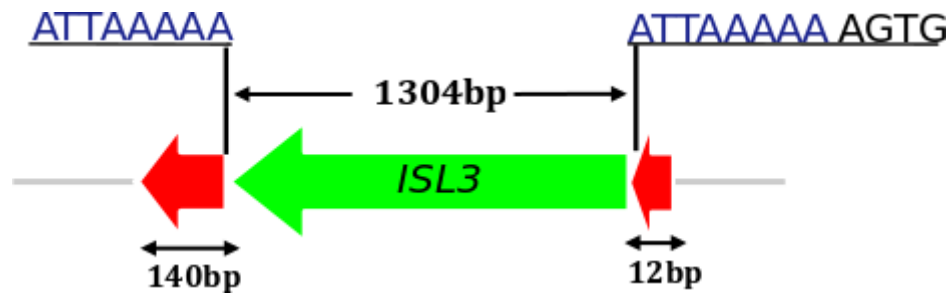

**Figure S3. Schematic representation of the insertion event occurring in the *mgrB* gene.**

The duplicated sequences are shown in blue (upstream and downstream of the *mgrB* gene). Red arrows show the interruption of the *mgrB* gene due to the insertion of the ISL3-like element (green).
